# Supplementary material for: Solid-state landscape and biopharmaceutical implications of novel metformin-based salts
Source: Royal Society of Chemistry journal article supplement (doi:10.1039/d2nj00453d), 2022-01-01
Supplement: d2nj00453d1.pdf [file d2nj00453d1.pdf]

## ELECTRONIC SUPPLEMENTARY INFORMATION

### Solid-state landscape and biopharmaceutical implications of novel metformin based-salts

Luan F. Diniz<sup>a,b</sup>, Paulo S. Carvalho Jr<sup>c</sup>, José E. Gonçalves<sup>a</sup>, Renata Diniz<sup>b\*</sup>, Christian Fernandes<sup>a\*</sup>

<sup>a</sup>Laboratório de Controle de Qualidade de Medicamentos e Cosméticos, Departamento de Produtos Farmacêuticos, Faculdade de Farmácia, Universidade Federal de Minas Gerais, 31270-901, Belo Horizonte, MG, Brazil.

<sup>b</sup>Departamento de Química, Instituto de Ciências Exatas (ICEx), Universidade Federal de Minas Gerais, 31270-901-Belo Horizonte, MG, Brazil.

<sup>c</sup>Instituto de Física, Universidade Federal do Mato Grosso do Sul, 79074-460, Campo Grande, MS, Brazil.

\*E-mail: dinizr@qui.ufmg.br, cfernandes@farmacia.ufmg.br

### COMPLEMENTARY FIGURES AND TABLES

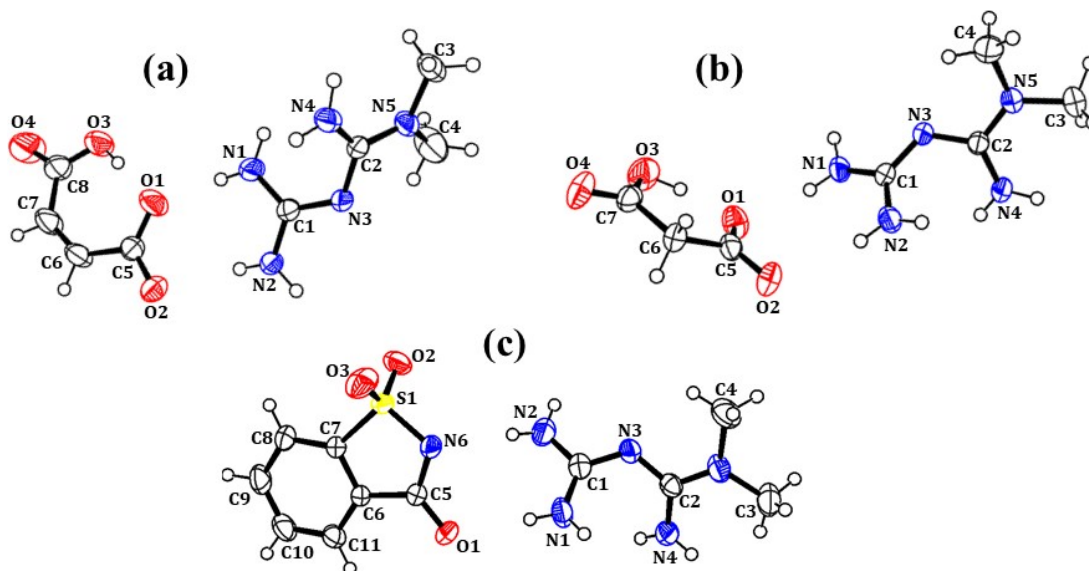

**Figure S1.** ORTEP type diagrams of the MET salts asymmetric units with 50% probability ellipsoids showing atomic numbering scheme: (a) metformin maleate (MET-MAL), (b) metformin malonate (MET-MLN), and (c) metformin saccharinate (MET-SAC). Hydrogen atoms are shown as spheres of arbitrary radii.

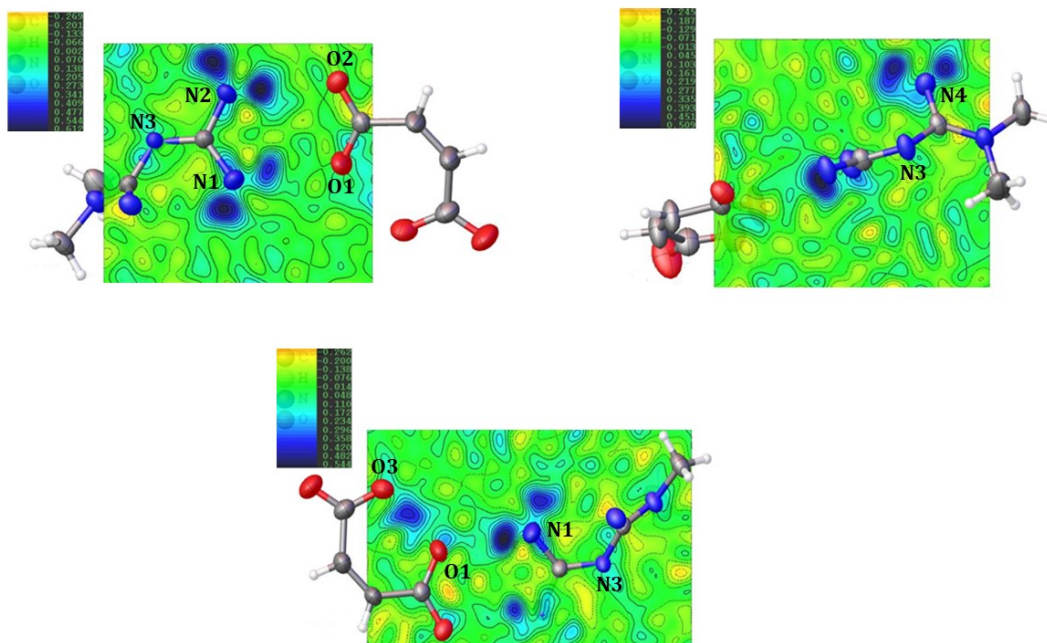

**Figure S2.** Fourier difference maps, under different perspectives, of both metformin cation (MET<sup>+</sup>) and maleate anion (MAL<sup>-</sup>) molecules from MET-MAL salt, showing in which O- and N-atoms the H-atoms are attached (blue spots).

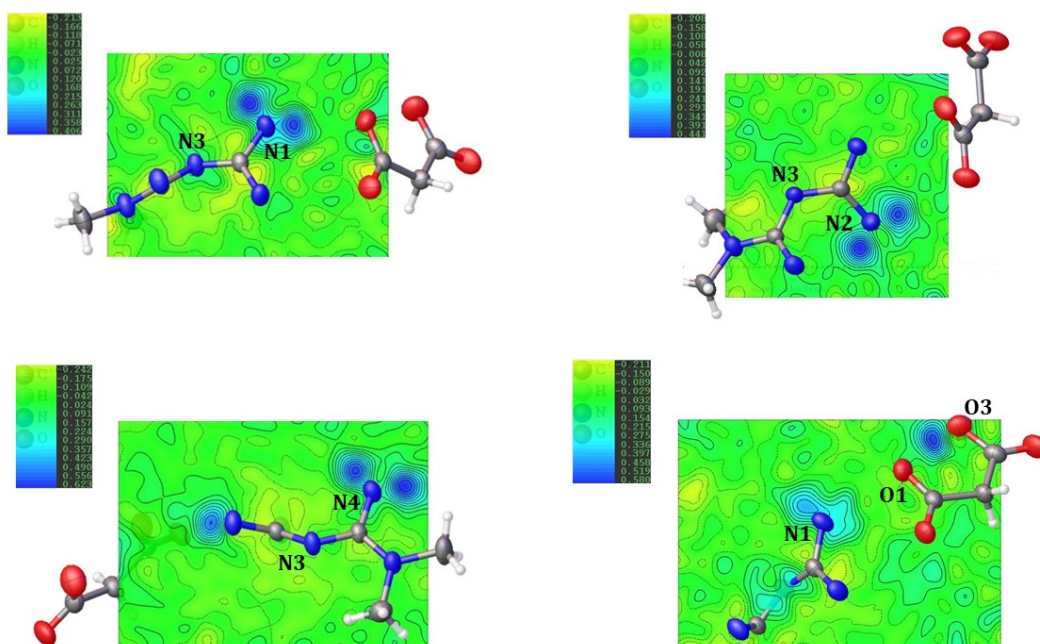

**Figure S3.** Fourier difference maps, under different perspectives, of both metformin cation (MET<sup>+</sup>) and malonate anion (MLN<sup>-</sup>) molecules from MET-MLN salt, showing in which O- and N-atoms the H-atoms are attached (blue spots).

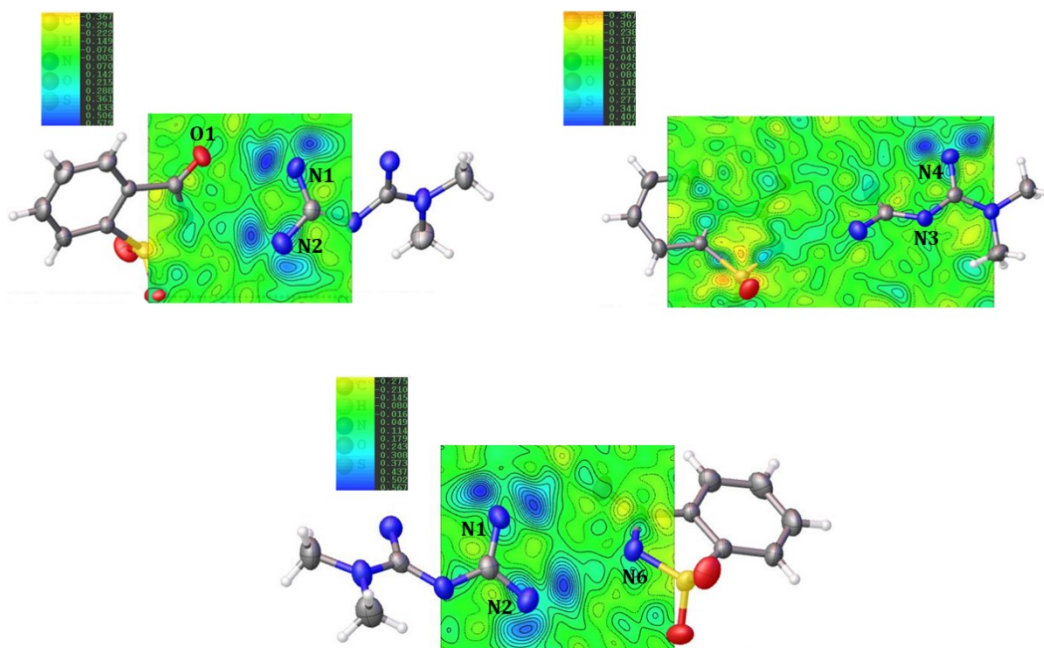

**Figure S4.** Fourier difference maps, under different perspectives, of both metformin cation ( $\text{MET}^+$ ) and saccharinate anion ( $\text{SAC}^-$ ) molecules from MET-SAC salt, showing in which O- and N-atoms the H-atoms are attached (blue spots).

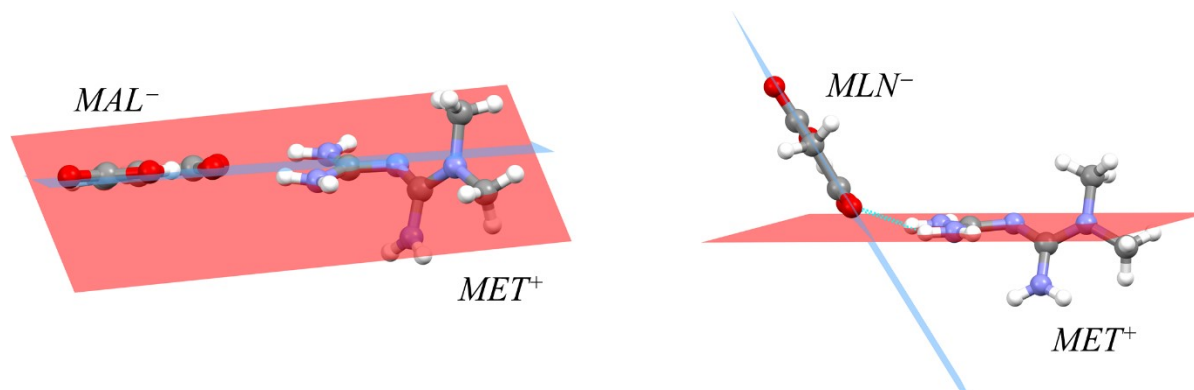

**Figure S5.** Molecular planes view involved in the cation $\cdots$ anion motif formation of the maleate and malonate metformin salts. The existence of coplanarity between the planes is observed only in the maleate salt structure.

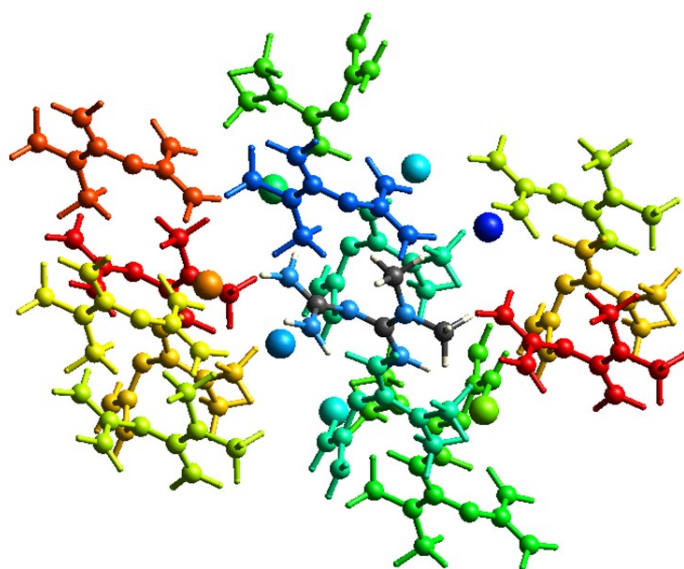

| N | Symop             | R    | E_ele | E_pol | E_dis | E_rep | E_tot |
|---|-------------------|------|-------|-------|-------|-------|-------|
| 2 | x, y, z           | 8.57 | -1.6  | -0.7  | -4.3  | 2.2   | -4.5  |
| 1 | -x, -y, -z        | 9.63 | 1.5   | -0.3  | -2.4  | 0.3   | -0.6  |
| 2 | x, -y+1/2, z+1/2  | 7.37 | 0.0   | -1.6  | 0.0   | 0.0   | -1.2  |
| 1 | -x, -y, -z        | 9.61 | 2.6   | -0.2  | -0.9  | 0.0   | 1.9   |
| 2 | x, y, z           | 7.92 | 1.6   | -0.2  | -2.6  | 0.2   | -0.6  |
| 1 | -                 | 5.23 | -1.1  | -1.6  | -12.5 | 10.5  | -6.8  |
| 2 | -x, y+1/2, -z+1/2 | 7.71 | -0.1  | -0.2  | -2.7  | 0.1   | -2.5  |
| 1 | -x, -y, -z        | 8.33 | 0.6   | -0.2  | -2.9  | 0.3   | -1.9  |
| 1 | -                 | 5.48 | 1.5   | -0.3  | -2.4  | 0.3   | -0.6  |
| 2 | x, -y+1/2, z+1/2  | 4.18 | -36.6 | -18.1 | -40.3 | 72.3  | -42.5 |
| 1 | -                 | 4.54 | -1.3  | -0.1  | -0.6  | 0.0   | -1.9  |
| 1 | -                 | 5.04 | 1.6   | -0.2  | -2.6  | 0.2   | -0.6  |
| 1 | -                 | 5.00 | 2.6   | -0.2  | -0.9  | 0.0   | 1.9   |
| 1 | -x, -y, -z        | 5.66 | -2.4  | -1.0  | -24.2 | 15.3  | -14.9 |
| 1 | -                 | 5.61 | -2.4  | -1.0  | -24.2 | 15.3  | -14.9 |
| 1 | -                 | 5.61 | -2.4  | -1.0  | -24.2 | 15.3  | -14.9 |
| 1 | -                 | 5.04 | 1.6   | -0.2  | -2.6  | 0.2   | -0.6  |
| 1 | -                 | 5.23 | -1.1  | -1.6  | -12.5 | 10.5  | -6.8  |
| 1 | -                 | 5.00 | 2.6   | -0.2  | -0.9  | 0.0   | 1.9   |
| 1 | -                 | 5.48 | 1.5   | -0.3  | -2.4  | 0.3   | -0.6  |
| 1 | -                 | 4.54 | -1.3  | -0.1  | -0.6  | 0.0   | -1.9  |

**Figure S6.** Interaction energies for MET-HCl salt calculated with B3LYP model.  $R$  is the distance ( $\text{\AA}$ ) between molecular centroids (mean atomic position) and  $N$  is the number of times the interaction appears within a radius of  $3.8\text{\AA}$  from the  $\text{MET}^+$  cation (uncolored molecule).

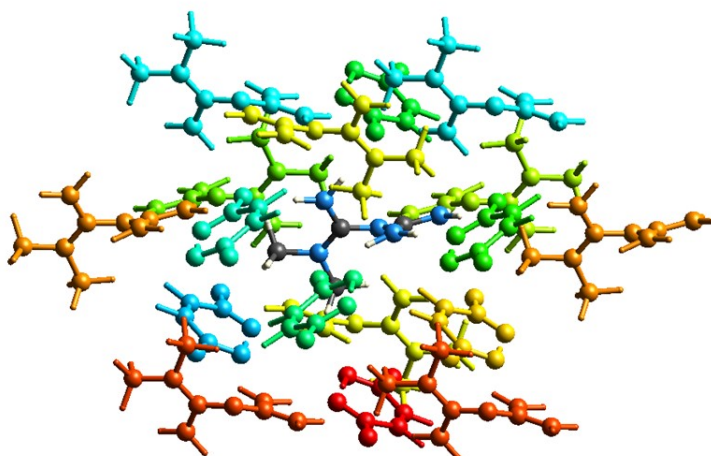

| N | Symop                 | R    | E_ele | E_pol | E_dis | E_rep | E_tot |
|---|-----------------------|------|-------|-------|-------|-------|-------|
| 1 | -                     | 6.03 | -1.3  | -0.3  | -6.9  | 4.1   | -5.1  |
| 2 | -x+1/2, y+1/2, -z+1/2 | 7.93 | -0.7  | -0.1  | -1.6  | 0.0   | -2.2  |
| 2 | x, y, z               | 8.89 | 0.9   | -0.5  | -7.0  | 5.4   | -2.2  |
| 1 | -                     | 5.28 | -11.1 | -3.3  | -17.1 | 11.6  | -21.9 |
| 2 | x+1/2, -y+1/2, z+1/2  | 7.24 | -1.7  | -0.3  | -6.4  | 4.4   | -4.8  |
| 1 | -x, -y, -z            | 5.71 | -64.9 | -19.5 | -21.1 | 77.7  | -53.4 |
| 1 | -x, -y, -z            | 5.91 | -7.8  | -3.7  | -22.8 | 8.8   | -25.3 |
| 1 | -                     | 6.81 | -32.3 | -3.8  | -11.3 | 65.4  | -6.5  |
| 1 | -                     | 5.05 | -19.3 | -3.2  | -16.5 | 27.3  | -20.3 |
| 1 | -                     | 5.63 | -13.1 | -2.8  | -17.0 | 44.7  | -3.1  |
| 1 | -                     | 6.09 | -12.9 | -2.3  | -11.7 | 29.3  | -7.4  |
| 2 | -x+1/2, y+1/2, -z+1/2 | 7.26 | -1.8  | -0.6  | -6.4  | 1.1   | -7.2  |
| 1 | -                     | 6.28 | 1.1   | -0.8  | -11.6 | 5.2   | -6.4  |
| 1 | -x, -y, -z            | 4.21 | 0.3   | -1.9  | -14.9 | 5.9   | -10.5 |
| 1 | -                     | 6.09 | -12.9 | -2.3  | -11.7 | 29.3  | -7.4  |
| 1 | -                     | 5.05 | -19.3 | -3.2  | -16.5 | 27.3  | -20.3 |
| 1 | -                     | 5.28 | -11.1 | -3.3  | -17.1 | 11.6  | -21.9 |
| 1 | -                     | 5.63 | -13.1 | -2.8  | -17.0 | 44.7  | -3.1  |
| 1 | -x, -y, -z            | 6.21 | 2.0   | -0.1  | -2.3  | 0.1   | 0.1   |
| 1 | -                     | 6.81 | -32.3 | -3.8  | -11.3 | 65.4  | -6.5  |
| 1 | -                     | 6.28 | 1.1   | -0.8  | -11.6 | 5.2   | -6.4  |
| 1 | -                     | 6.03 | -1.3  | -0.3  | -6.9  | 4.1   | -5.1  |

**Figure S7.** Interaction energies for MET-MAL salt calculated with B3LYP model.  $R$  is the distance ( $\text{\AA}$ ) between molecular centroids (mean atomic position) and  $N$  is the number of times the interaction appears within a radius of  $3.8\text{\AA}$  from the  $\text{MET}^+$  cation (uncolored molecule).



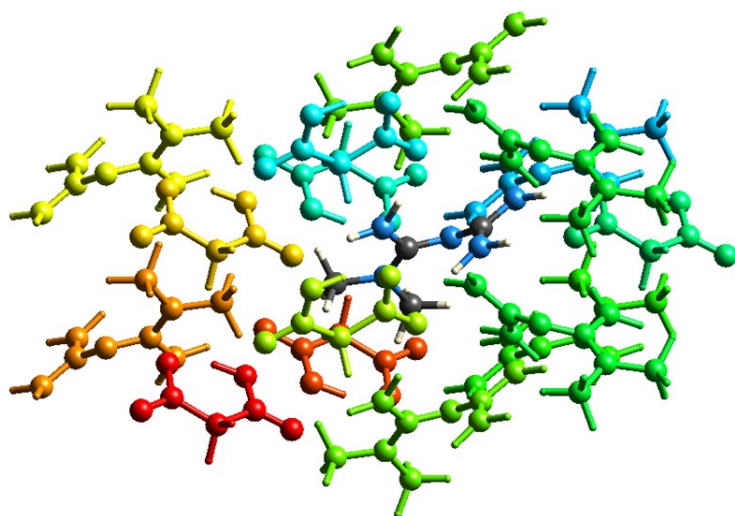

| N | Symp              | R    | E_ele | E_pol | E_dis | E_rep | E_tot |
|---|-------------------|------|-------|-------|-------|-------|-------|
| 1 | -                 | 7.95 | -0.0  | -0.1  | -1.7  | 0.3   | -1.4  |
| 1 | -                 | 6.21 | -0.6  | -1.3  | -10.5 | 3.6   | -8.5  |
| 1 | -x, -y, -z        | 9.27 | -0.9  | -0.1  | -8.2  | 5.5   | -4.8  |
| 1 | -                 | 6.69 | -16.8 | -2.4  | -9.9  | 33.6  | -7.4  |
| 1 | -x, -y, -z        | 9.30 | -1.0  | -0.1  | -1.2  | 0.0   | -2.1  |
| 1 | -                 | 5.02 | -8.3  | -1.8  | -15.6 | 30.2  | -5.1  |
| 2 | x, y, z           | 5.01 | 3.9   | -2.9  | -17.4 | 5.9   | -9.6  |
| 1 | -x, -y, -z        | 5.40 | -0.6  | -2.5  | -22.3 | 16.3  | -11.9 |
| 2 | -x, y+1/2, -z+1/2 | 7.58 | -0.4  | -0.7  | -8.2  | 4.2   | -5.5  |
| 1 | -                 | 6.66 | -36.2 | -4.2  | -11.8 | 70.1  | -8.3  |
| 1 | -                 | 5.71 | -1.0  | -0.6  | -8.0  | 3.7   | -6.3  |
| 1 | -                 | 5.64 | -2.7  | -2.8  | -14.3 | 27.0  | -0.7  |
| 1 | -x, -y, -z        | 5.46 | -61.7 | -19.6 | -27.6 | 87.0  | -50.0 |
| 2 | x, y, z           | 5.01 | 0.9   | -1.4  | -7.0  | 3.9   | -3.8  |
| 2 | -x, y+1/2, -z+1/2 | 4.81 | -13.9 | -2.9  | -14.9 | 13.9  | -21.2 |
| 1 | -                 | 5.64 | -2.7  | -2.8  | -14.3 | 27.0  | -0.7  |
| 1 | -                 | 6.21 | -0.6  | -1.3  | -10.5 | 3.6   | -8.5  |
| 1 | -                 | 6.66 | -36.2 | -4.2  | -11.8 | 70.1  | -8.3  |
| 1 | -                 | 5.02 | -8.3  | -1.8  | -15.6 | 30.2  | -5.1  |
| 1 | -                 | 5.71 | -1.0  | -0.6  | -8.0  | 3.7   | -6.3  |
| 1 | -                 | 6.69 | -16.8 | -2.4  | -9.9  | 33.6  | -7.4  |
| 1 | -                 | 7.95 | -0.0  | -0.1  | -1.7  | 0.3   | -1.4  |

**Figure S8.** Interaction energies for MET-MLN salt calculated with B3LYP model.  $R$  is the distance ( $\text{\AA}$ ) between molecular centroids (mean atomic position) and  $N$  is the number of times the interaction appears within a radius of  $3.8\text{\AA}$  from the  $\text{MET}^+$  cation (uncolored molecule).

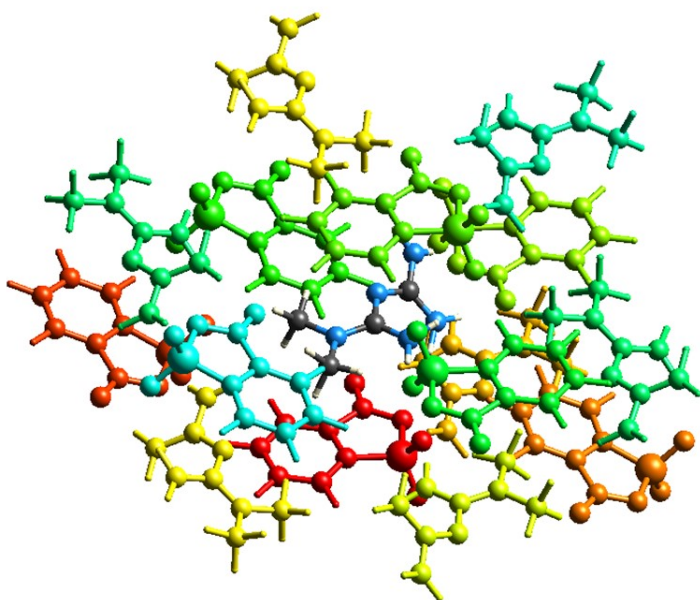

| N | Symp                  | R    | E_ele | E_pol | E_dis | E_rep | E_tot |
|---|-----------------------|------|-------|-------|-------|-------|-------|
| 1 | -                     | 4.14 | -14.8 | -2.9  | -41.3 | 37.6  | -30.5 |
| 1 | -                     | 7.98 | 0.4   | -0.9  | -5.2  | 4.9   | -1.8  |
| 1 | -                     | 8.65 | 4.3   | -0.9  | -5.2  | 1.7   | 0.4   |
| 1 | -x, -y, -z            | 7.21 | -5.6  | -1.0  | -8.0  | 4.9   | -10.7 |
| 2 | x+1/2, -y+1/2, z+1/2  | 8.26 | -1.0  | -0.3  | -5.9  | 1.8   | -5.4  |
| 1 | -x, -y, -z            | 8.18 | 1.3   | -0.2  | -2.3  | 0.0   | -0.7  |
| 1 | -                     | 7.25 | -30.5 | -5.0  | -14.5 | 59.1  | -12.1 |
| 1 | -                     | 3.84 | -21.1 | -6.6  | -41.1 | 33.1  | -42.5 |
| 1 | -                     | 6.69 | -6.8  | -2.9  | -15.2 | 6.6   | -18.5 |
| 1 | -                     | 6.62 | -14.3 | -3.3  | -10.4 | 25.3  | -11.0 |
| 2 | -x+1/2, y+1/2, -z+1/2 | 7.83 | -1.0  | -0.2  | -4.5  | 1.3   | -4.3  |
| 1 | -x, -y, -z            | 8.32 | -4.6  | -1.2  | -7.8  | 6.8   | -8.3  |
| 1 | -                     | 7.99 | -1.6  | -1.7  | -10.5 | 13.9  | -3.6  |
| 1 | -x, -y, -z            | 7.42 | -1.4  | -0.6  | -2.2  | 0.1   | -3.7  |
| 2 | x+1/2, -y+1/2, z+1/2  | 8.62 | -7.9  | -1.9  | -5.7  | 7.8   | -9.9  |
| 1 | -                     | 4.14 | -14.8 | -2.9  | -41.3 | 37.6  | -30.5 |
| 1 | -                     | 6.69 | -6.8  | -2.9  | -15.2 | 6.6   | -18.5 |
| 2 | -x+1/2, y+1/2, -z+1/2 | 7.93 | -8.1  | -1.3  | -7.8  | 4.0   | -13.8 |
| 1 | -                     | 8.65 | 4.3   | -0.9  | -5.2  | 1.7   | 0.4   |
| 1 | -x, -y, -z            | 6.49 | -20.8 | -3.1  | -11.1 | 12.8  | -26.1 |
| 1 | -                     | 6.62 | -14.3 | -3.3  | -10.4 | 25.3  | -11.0 |
| 1 | -                     | 7.25 | -30.5 | -5.0  | -14.5 | 59.1  | -12.1 |
| 1 | -                     | 3.84 | -21.1 | -6.6  | -41.1 | 33.1  | -42.5 |
| 1 | -                     | 7.99 | -1.6  | -1.7  | -10.5 | 13.9  | -3.6  |
| 1 | -                     | 7.98 | 0.4   | -0.9  | -5.2  | 4.9   | -1.8  |

**Figure S9.** Interaction energies for MET-SAC salt calculated with B3LYP model.  $R$  is the distance ( $\text{\AA}$ ) between molecular centroids (mean atomic position) and  $N$  is the number of times the interaction appears within a radius of  $3.8\text{\AA}$  from the  $\text{MET}^+$  cation (uncolored molecule).

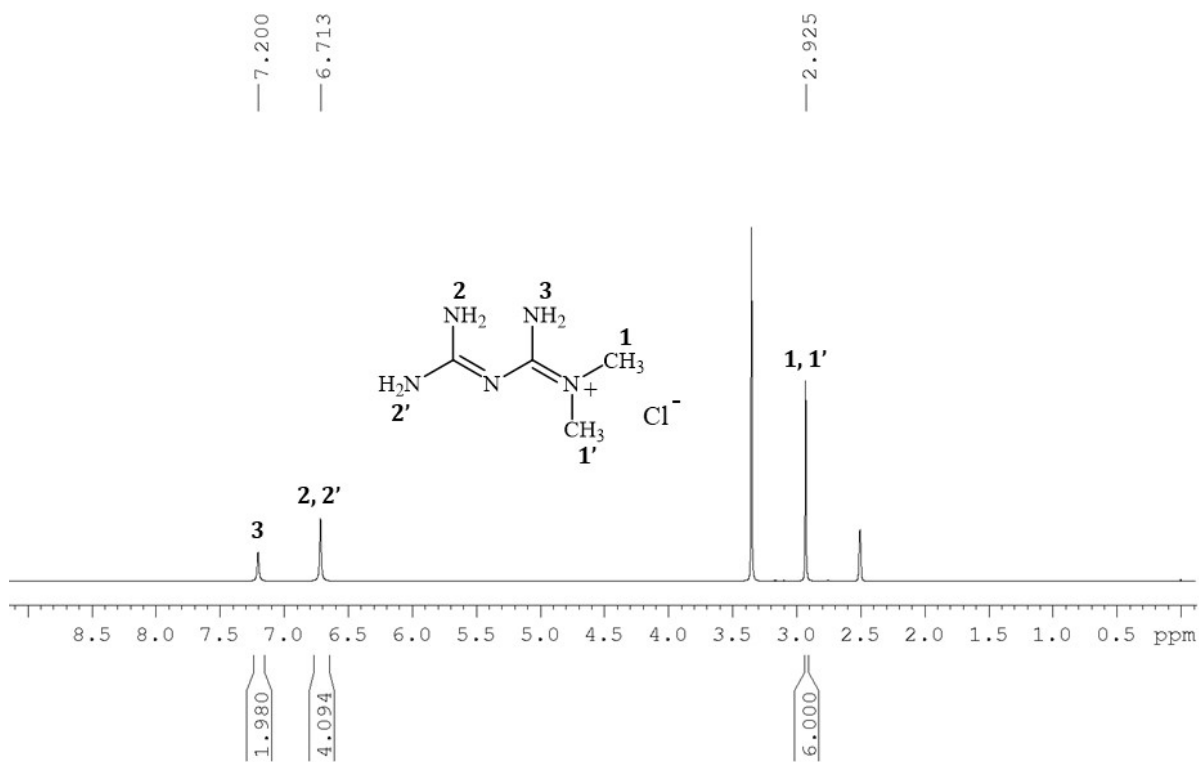

**Figure S10.**  $^1\text{H}$  NMR (400 MHz) spectrum of metformin hydrochloride (MET-HCl) in  $\text{DMSO-}d_6$ .

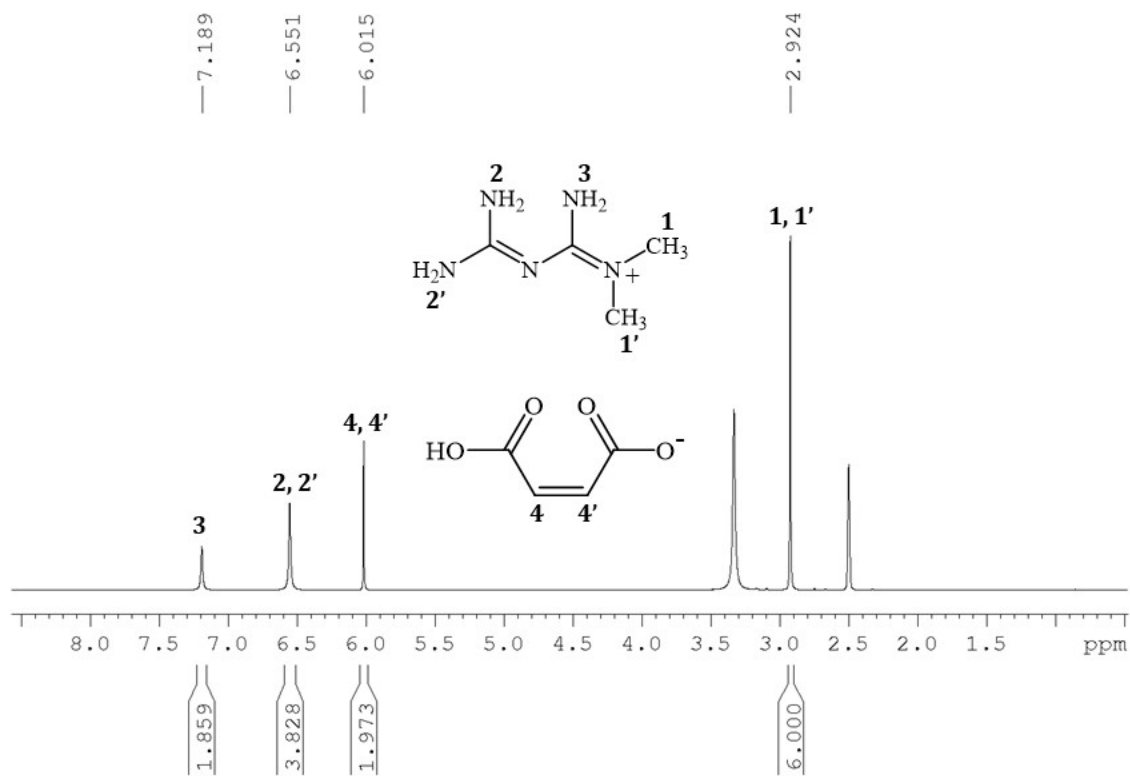

**Figure S11.**  $^1\text{H}$  NMR (400 MHz) spectrum of metformin maleate (MET-MAL) in  $\text{DMSO-}d_6$ .

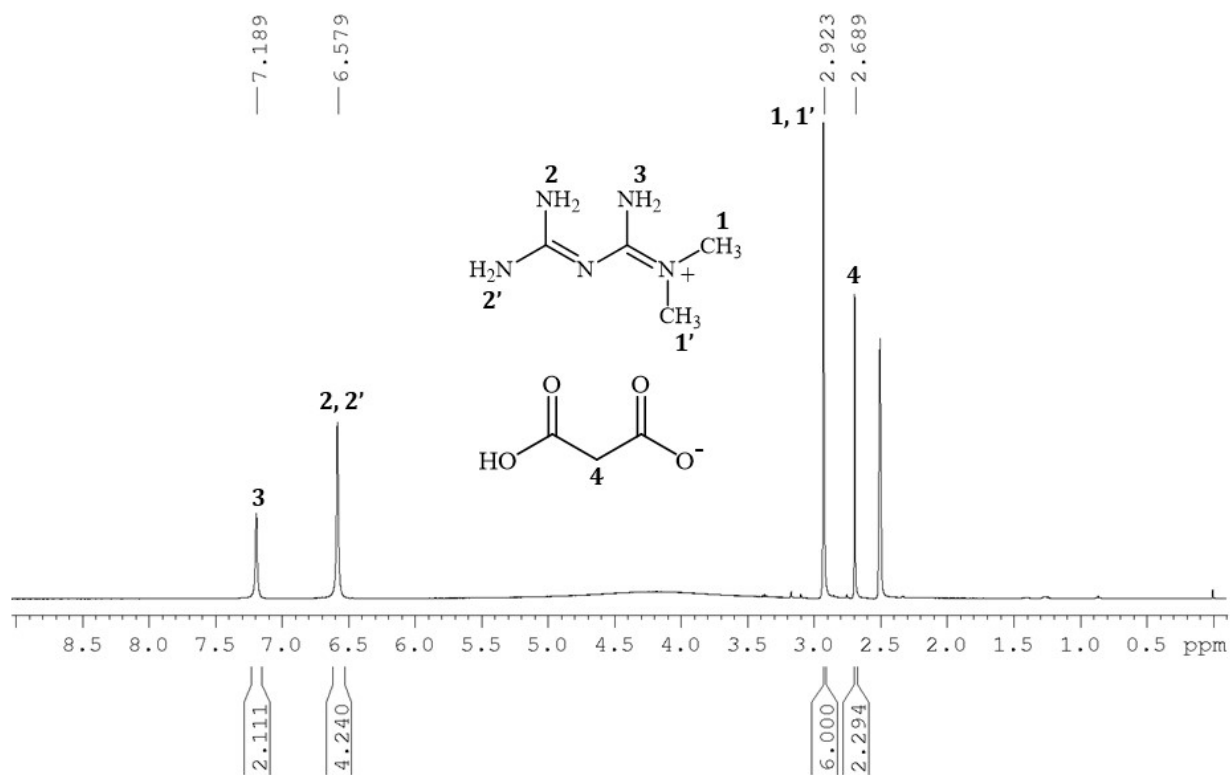

**Figure S12.** <sup>1</sup>H NMR (400 MHz) spectrum of metformin malonate (MET-MLN) in DMSO-*d*<sub>6</sub>.

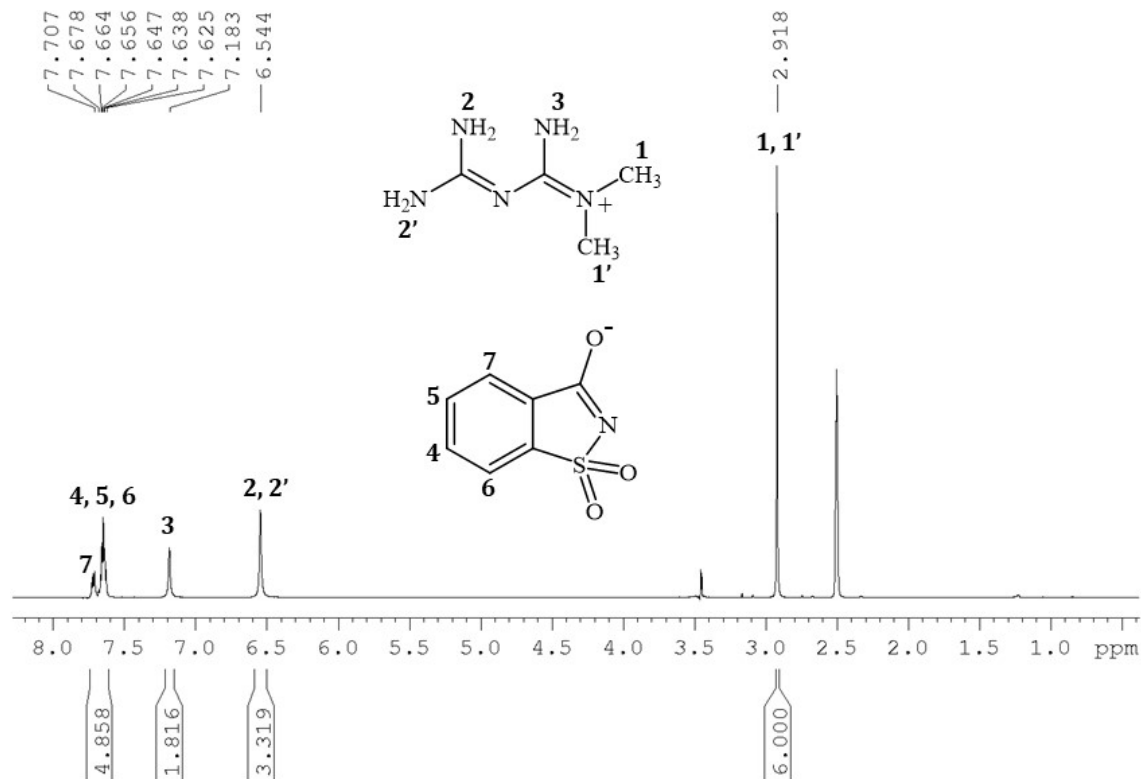

**Figure S13.** <sup>1</sup>H NMR (400 MHz) spectrum of metformin saccharinate (MET-SAC) in DMSO-*d*<sub>6</sub>.

**Table S1.** Results of linearity, accuracy and precision obtained during validation of the analytical method.

| Parameter                                     | Results                       |
|-----------------------------------------------|-------------------------------|
| Linearity                                     |                               |
| Concentration range ( $\mu\text{g mL}^{-1}$ ) | 8.0-40.0                      |
| Regression                                    | F = 74389 (p < 0.001)         |
| Lack of fit                                   | F = 2.64 (p = 0.10)           |
| Slope (b)                                     | 111531                        |
| Intercept (a)                                 | -47289                        |
| Coefficient of determination ( $R^2$ )        | 0.9998                        |
| Accuracy                                      |                               |
| Level 1 (8.0 $\mu\text{g mL}^{-1}$ )          | Mean recovery: 99.98% (n = 6) |
| Level 2 (24.0 $\mu\text{g mL}^{-1}$ )         | Mean recovery: 100.03 (n = 6) |
| Level 3 (40.0 $\mu\text{g mL}^{-1}$ )         | Mean recovery: 100.25 (n = 6) |
| Precision                                     |                               |
| Repeatability (RSD%)                          | 0.27-0.83 (n = 3)             |
| Intermediate (RSD%)                           | 0.37-0.64 (n = 6)             |

RSD, relative standard deviation.

**Table S2.** Parameters of the calibration curves obtained during validation of the bioanalytical method.

| Day of analysis | Linearity range ( $\text{ng mL}^{-1}$ ) | Linear regression |               |        |
|-----------------|-----------------------------------------|-------------------|---------------|--------|
|                 |                                         | Slope (b)         | Intercept (a) | $R^2$  |
| First           | 200-1400                                | 108.19            | -1031         | 0.9995 |
| Second          |                                         | 108.24            | -1079         | 0.9997 |
| Third           |                                         | 108.78            | -1173         | 0.9998 |

$R^2$ , coefficient of determination.



**Table S3.** Precision, accuracy, and recovery assays performed during validation of the bioanalytical method.

| Level   | Nominal concentration (ng mL <sup>-1</sup> ) | Within-run (n = 5)         |                   |                  | Between runs (n = 15)      |                   |                  |
|---------|----------------------------------------------|----------------------------|-------------------|------------------|----------------------------|-------------------|------------------|
|         |                                              | MMC (ng mL <sup>-1</sup> ) | Precision RSD (%) | Accuracy RSE (%) | MMC (ng mL <sup>-1</sup> ) | Precision RSD (%) | Accuracy RSE (%) |
| LLOQ QC | 200                                          | 194.6                      | 2.06              | -2.71            | 200.2                      | 3.71              | 0.09             |
| LQC     | 500                                          | 490.2                      | 1.90              | -1.95            | 488.6                      | 1.26              | -2.28            |
| MQC     | 800                                          | 801.4                      | 0.24              | 0.18             | 784.6                      | 1.75              | -1.92            |
| HQC     | 1100                                         | 1107.0                     | 0.32              | 0.64             | 1086.4                     | 1.82              | -1.24            |
| DQC     | 2000                                         | 1954.6                     | 0.27              | -2.27            | 1949.6                     | 0.95              | -2.52            |

MMC, mean measured concentration; RSE, relative standard error; RSD, relative standard deviation; LLOQ QC, lower limit of quantification quality control; LQC, low quality control; MQC, mid quality control; HQC high quality control; DQC, dilution quality control.

**Table S4.** Results of stability assays obtained during validation of the bioanalytical method.

| Level | Nominal concentration (ng mL <sup>-1</sup> ) | Bench-top stability (room temperature for 1.5 h) |         | Long-term stability (-70 °C for 4.5 h) |         | Freeze-thaw stability (three cycles) |         |
|-------|----------------------------------------------|--------------------------------------------------|---------|----------------------------------------|---------|--------------------------------------|---------|
|       |                                              | RSD (%)                                          | RSE (%) | RSD (%)                                | RSE (%) | RSD (%)                              | RSE (%) |
| LQC   | 500                                          | 1.03                                             | -2.75   | 0.57                                   | -3.61   | 3.52                                 | -1.72   |
| HQC   | 1100                                         | 0.15                                             | 0.46    | 0.41                                   | 1.06    | 2.77                                 | 3.04    |

RSE, relative standard error; RSD, relative standard deviation; LQC, low quality control; HQC, high quality control.

**Table S5.** Composition of the solutions and standard buffer solutions used in the solubility and dissolution experiments.

| <b>Hydrochloric Acid (HCl) Solution (1000 mL)</b>          |      |
|------------------------------------------------------------|------|
| pH                                                         | 1.2  |
| Conc. (mol/L)                                              | 0.1  |
| HCl <sub>conc.</sub> (mL)                                  | 8.4  |
| Deionized water to complete the 1000 mL volumetric flask   |      |
| <b>Acetic Acid Solution (1000 mL)</b>                      |      |
| Conc. (mol/L)                                              | 0.2  |
| CH <sub>3</sub> COOH <sub>glacial</sub> (mL)               | 11.5 |
| Deionized water to complete the 1000 mL volumetric flask   |      |
| <b>Sodium Acetate Solution (1000 mL)</b>                   |      |
| Conc. (mol/L)                                              | 0.2  |
| C <sub>2</sub> H <sub>3</sub> O <sub>2</sub> Na (g)        | 16.4 |
| Deionized water to complete the 1000 mL volumetric flask   |      |
| <b>Acetate Buffer (1000 mL)</b>                            |      |
| pH                                                         | 4.5  |
| 0.2 M C <sub>2</sub> H <sub>3</sub> O <sub>2</sub> Na (mL) | 220  |
| 0.2 M CH <sub>3</sub> COOH (mL)                            | 250  |
| Deionized water to complete the 1000 mL volumetric flask   |      |
| <b>Monopotassium Phosphate Solution (1000 mL)</b>          |      |
| Conc. (mol/L)                                              | 0.2  |
| KH <sub>2</sub> PO <sub>4</sub> (g)                        | 27.2 |
| Deionized water to complete the 1000 mL volumetric flask   |      |
| <b>Dipotassium Phosphate Solution (1000 mL)</b>            |      |
| Conc. (mol/L)                                              | 0.2  |
| K <sub>2</sub> HPO <sub>4</sub> (g)                        | 34.8 |
| Deionized water to complete the 1000 mL volumetric flask   |      |
| <b>Phosphate Buffer (1000 mL)</b>                          |      |
| pH                                                         | 6.8  |
| 0.2 M KH <sub>2</sub> PO <sub>4</sub> (mL)                 | 255  |
| 0.2 M K <sub>2</sub> HPO <sub>4</sub> (mL)                 | 245  |
| Deionized water to complete the 1000 mL volumetric flask   |      |

**Table S6.** Calculated  $\Delta pK_a$  between MET and the salt formers.

| Compound            | pKa  | $\Delta pK_a =$<br>(pK <sub>a</sub> (base) – pK <sub>a</sub> (acid)) | Stoichiometry |
|---------------------|------|----------------------------------------------------------------------|---------------|
| Metformin free base | 12.4 | -                                                                    |               |
| Maleic acid         | 1.93 | 10.47                                                                | 1:1 salt      |
| Malonic acid        | 2.84 | 9.56                                                                 | 1:1 salt      |
| Saccharin           | 1.60 | 10.80                                                                | 1:1 salt      |

**Table S7.** Principal FT-IR bands ( $\text{cm}^{-1}$ ) for the novel MET salts.

| MET-MAL       | MET-MLN    | MET-SAC       | Assignment                                 |
|---------------|------------|---------------|--------------------------------------------|
| 3350 and 3194 | 3328, 3149 | 3344 and 3150 | $\nu(\text{NH}_2)_{\text{amine}}$          |
| 2936          | 2937       | 2930          | $\nu(\text{CH})_{\text{aliphatic}}$        |
| 1706          | 1730       | -             | $\nu(\text{CO})_{\text{carboxyl}}$         |
| -             | -          | 1638          | $\nu(\text{CO})_{\text{amide}}$            |
| 1604          | 1589       | -             | $\nu_a(\text{COO}^-)_{\text{carboxylate}}$ |
| 1414          | 1425       | -             | $\nu_s(\text{COO}^-)_{\text{carboxylate}}$ |
| -             | -          | 1332 and 1140 | $\nu(\text{SO}_2)_{\text{sulphonyl}}$      |

$\nu$  = stretching;  $a$  = antisymmetric;  $s$  = symmetric.

**Table S8.** pH measured in different dissolution media before and after solubility studies.

| Dissolution media                       | pH 6.8 | pH 4.5 | pH 1.2 | H <sub>2</sub> O |
|-----------------------------------------|--------|--------|--------|------------------|
| pH (dissolution media before the tests) | 6.80   | 4.50   | 1.20   | 5.90             |
| pH (MET-HCl solution)                   | 6.68   | 4.41   | 1.23   | 3.35             |
| pH (MET-MAL solution)                   | 6.73   | 4.45   | 1.26   | 3.58             |
| pH (MET-MLN solution)                   | 6.75   | 4.47   | 1.25   | 3.64             |
| pH (MET-SAC solution)                   | 6.71   | 4.43   | 1.27   | 3.53             |
